# Supplementary material
Source: MDPI journal article supplement (https://www.mdpi.com/2227-9717/10/3/536)
Supplement: s1 [file s1]

## Supplementary Materials

**Table S1.** The standards of the analyzed method for selected metals in the laboratory

| Heavy metals | Analyses methods                                                                                                                                                                                                                                                                                                             |
|--------------|------------------------------------------------------------------------------------------------------------------------------------------------------------------------------------------------------------------------------------------------------------------------------------------------------------------------------|
| Cr           | HJ 491-2019 Soil and sediment—Determination of copper, zinc, lead, nickel and chromium—Flame atomic absorption spectrophotometry /USEPA-6020B-T                                                                                                                                                                              |
| Ni           | HJ 491-2019 Soil and sediment—Determination of copper, zinc, lead, nickel and chromium—Flame atomic absorption spectrophotometry /USEPA-6020B-T                                                                                                                                                                              |
| Cu           | HJ 491-2019 Soil and sediment—Determination of copper, zinc, lead, nickel and chromium—Flame atomic absorption spectrophotometry /USEPA-6020B-T                                                                                                                                                                              |
| Zn           | HJ 491-2019 Soil and sediment—Determination of copper, zinc, lead, nickel and chromium—Flame atomic absorption spectrophotometry /USEPA-6020B-T                                                                                                                                                                              |
| As           | GB/T 22105.2-2008 Soil quality-Analysis of total mercury, arsenic and lead contents-Atomic fluorescence spectrometry-Part2: Analysis of Total Arsenic contents in soil /USEPA-6020B-T/HJ 803-2016 Soil and sediment-Determination of aqua regia extracts of 12 metals elements- Inductively coupled plasma mass spectrometry |
| Cd           | GB/T 17141-1997 Soil quality-Determination of lead, cadmium-Graphite furnace atomic absorption spectrophotometry/USEPA-6020B-T                                                                                                                                                                                               |
| Hg           | GB/T 22105.2-2008 Soil quality-Analysis of total mercury, arsenic and lead contents-Atomic fluorescence spectrometry-Part1: Analysis of total mercury contents in soils /USEPA-6020B-T/GB/T 17136-1997 Soil quality-Determination of total mercury-Cold atomic absorption spectrometry                                       |
| Pb           | GB/T 17141-1997 Soil quality-Determination of lead, cadmium-Graphite furnace atomic absorption spectrophotometry /USEPA-6020B-T                                                                                                                                                                                              |

**Table S2.** Statistics characteristics of pXRF and Lab analyzed result of samples from pXRF low-value dataset (mg kg<sup>-1</sup>)

| Heavy metal | pXRF-Cr | pXRF-Ni | pXRF-Cu | pXRF-Zn | pXRF-As | pXRF-Cd | pXRF-Hg | pXRF-Pb |
|-------------|---------|---------|---------|---------|---------|---------|---------|---------|
| Counts      | 1144    | 1949    | 1843    | 1367    | 2071    | 151     | 456     | 2202    |
| Mean        | 51.10   | 20.19   | 20.66   | 61.67   | 6.85    | 0.11    | 0.043   | 18.65   |
| Std         | 18.89   | 8.11    | 8.52    | 16.76   | 3.33    | 0.060   | 0.032   | 7.59    |
| Min         | 2.08    | 0.47    | 0.25    | 1.78    | 0.038   | 0.00030 | 0.00050 | 0.034   |
| 25%         | 38.17   | 14.26   | 15      | 52      | 4.31    | 0.062   | 0.018   | 13.65   |
| 50%         | 51      | 20      | 21.81   | 62      | 6.70    | 0.13    | 0.035   | 19      |
| 75%         | 65.12   | 26      | 27.58   | 73      | 9       | 0.17    | 0.059   | 24      |
| Max         | 89.05   | 39.86   | 34.84   | 99.56   | 14.84   | 0.20    | 0.15    | 34.78   |
| CV          | 0.37    | 0.40    | 0.41    | 0.27    | 0.49    | 0.53    | 0.76    | 0.41    |
| Heavy metal | Lab-Cr  | Lab-Ni  | Lab-Cu  | Lab-Zn  | Lab-As  | Lab-Cd  | Lab-Hg  | Lab-Pb  |
| Counts      | 1144    | 1949    | 1843    | 1367    | 2071    | 151     | 456     | 2202    |
| Mean        | 70.13   | 32.27   | 31.87   | 75.40   | 11.05   | 0.11    | 0.078   | 26.15   |
| Std         | 29.32   | 10.19   | 50.25   | 83.10   | 5.38    | 0.12    | 0.32    | 29.60   |
| Min         | 13.93   | 4.21    | 4       | 29      | 1.01    | 0.010   | 0.0030  | 7.30    |
| 25%         | 52      | 24      | 20      | 54      | 8.27    | 0.05    | 0.016   | 19.10   |
| 50%         | 64.28   | 33      | 26.46   | 63      | 10.50   | 0.072   | 0.024   | 23      |
| 75%         | 80      | 39      | 32      | 75      | 13.4    | 0.106   | 0.039   | 27.19   |
| Max         | 337     | 104     | 1350    | 1680    | 86.30   | 0.76    | 5.99    | 1040    |
| CV          | 0.42    | 0.32    | 1.58    | 1.10    | 0.49    | 1.14    | 4.14    | 1.13    |

**Table S3.** Statistics characteristics of pXRF and Lab analyzed result of samples from pXRF high-value dataset (mg kg<sup>-1</sup>)

| Heavy metal | pXRF-Cr | pXRF-Ni | pXRF-Cu | pXRF-Zn | pXRF-As | pXRF-Cd | pXRF-Hg | pXRF-Pb |
|-------------|---------|---------|---------|---------|---------|---------|---------|---------|
| Counts      | 219     | 159     | 389     | 240     | 650     | 954     | 90      | 300     |
| Mean        | 367.97  | 63.43   | 171.41  | 193.34  | 22.77   | 2.67    | 2.11    | 89.11   |
| Std         | 1028.73 | 16.65   | 622.74  | 267.91  | 12.45   | 2.62    | 3.09    | 73.34   |
| Min         | 90.01   | 40.51   | 35.08   | 100.61  | 15.01   | 0.20    | 0.15    | 35.56   |
| 25%         | 103     | 49.32   | 38.86   | 117     | 17      | 0.39    | 0.30    | 41      |
| 50%         | 129.86  | 62      | 46.34   | 133.63  | 20      | 2       | 1       | 61      |
| 75%         | 239     | 75.5    | 86.27   | 184.5   | 24      | 4       | 2.75    | 124     |
| Max         | 10845   | 106     | 7905    | 3044    | 201.58  | 13      | 25.62   | 670.80  |
| CV          | 2.80    | 0.26    | 3.63    | 1.39    | 0.55    | 0.98    | 1.46    | 0.82    |

  

| Heavy metal | Lab-Cr | Lab-Ni | Lab-Cu | Lab-Zn | Lab-As | Lab-Cd | Lab-Hg | Lab-Pb |
|-------------|--------|--------|--------|--------|--------|--------|--------|--------|
| Counts      | 219    | 159    | 389    | 240    | 650    | 954    | 90     | 300    |
| Mean        | 383.96 | 38.55  | 181.64 | 408.80 | 14.51  | 0.12   | 0.43   | 109.10 |
| Std         | 858.56 | 8.15   | 555.83 | 573.17 | 11.33  | 0.16   | 1.44   | 131.78 |
| Min         | 48     | 20     | 17     | 56     | 5.85   | 0.017  | 0.011  | 20     |
| 25%         | 74     | 33     | 30     | 144.75 | 9.79   | 0.060  | 0.046  | 35.38  |
| 50%         | 112    | 38     | 45     | 308.38 | 11.8   | 0.090  | 0.13   | 87.75  |
| 75%         | 280    | 43     | 115.29 | 490.49 | 16.28  | 0.12   | 0.31   | 127.44 |
| Max         | 7400   | 74     | 5000   | 5720   | 196.27 | 3.09   | 13.27  | 1380   |
| CV          | 2.24   | 0.21   | 3.06   | 1.40   | 0.78   | 1.32   | 3.35   | 1.21   |

**Table S4.** Validation statistics for predictive results of heavy metals using LR model and MARS model

| Heavy metals | LR             |        |      | MARS           |        |      |
|--------------|----------------|--------|------|----------------|--------|------|
|              | R <sup>2</sup> | RMSE   | RPD  | R <sup>2</sup> | RMSE   | RPD  |
| Cr           | 0.80           | 164.57 | 2.22 | 0.88           | 126.08 | 2.89 |
| Cu           | 0.73           | 125.1  | 1.94 | 0.77           | 115.22 | 2.11 |
| Pb           | 0.44           | 59.73  | 1.34 | 0.42           | 99.81  | 1.32 |
| Zn           | 0.37           | 208.11 | 1.26 | 0.28           | 221.95 | 1.18 |
| As           | 0.22           | 6.52   | 1.13 | 0.28           | 6.26   | 1.18 |
| Hg           | 0.16           | 0.61   | 1.09 | 0.29           | 0.56   | 1.19 |
| Ni           | 0.13           | 9.89   | 1.07 | 0.13           | 9.87   | 1.07 |
| Cd           | 0.0011         | 0.15   | 1.00 | -0.05          | 0.16   | 0.98 |

**Table S5.** Validation statistics for predictive results of heavy metals of samples in the pXRF low-value dataset using univariate LR model and MARS model

| Heavy metal | Background value (mg/kg) | LR             |       |      | MARS           |       |      |
|-------------|--------------------------|----------------|-------|------|----------------|-------|------|
|             |                          | R <sup>2</sup> | RMSE  | RPD  | R <sup>2</sup> | RMSE  | RPD  |
| Cr          | 90                       | 0.051          | 28.54 | 1.03 | 0.05           | 28.54 | 1.03 |
| Cu          | 35                       | 0.0025         | 50.17 | 1.00 | -0.0458        | 51.37 | 0.98 |
| Pb          | 40                       | -0.0017        | 29.62 | 1.00 | 0.02           | 29.82 | 0.99 |
| Ni          | 35                       | 0.085          | 9.75  | 1.05 | 0.09           | 9.72  | 1.05 |
| As          | 15                       | 0.045          | 5.26  | 1.02 | 0.05           | 5.25  | 1.03 |

| Heavy metal | Background value (mg/kg) | LR             |       |      | MARS           |       |      |
|-------------|--------------------------|----------------|-------|------|----------------|-------|------|
|             |                          | R <sup>2</sup> | RMSE  | RPD  | R <sup>2</sup> | RMSE  | RPD  |
| Hg          | 0.15                     | -0.006         | 0.32  | 1.00 | -0.0044        | 0.03  | 1    |
| Cd          | 100                      | -0.026         | 0.12  | 0.99 | -0.013         | 0.06  | 1    |
| Zn          | 0.2                      | -0.005         | 83.30 | 1.00 | -0.12          | 87.84 | 0.95 |

**Table S6.** Validation statistics for predictive results of heavy metals of sample in pXRF high-value dataset using univariate LR model and MARS model

| Heavy metal | Background value (mg/kg) | LR             |        |      | MARS           |        |      |
|-------------|--------------------------|----------------|--------|------|----------------|--------|------|
|             |                          | R <sup>2</sup> | RMSE   | RPD  | R <sup>2</sup> | RMSE   | RPD  |
| Cr          | 90                       | 0.80           | 387.12 | 2.22 | 0.87           | 306.14 | 2.8  |
| Cu          | 35                       | 0.75           | 277.74 | 2.00 | 0.79           | 255.5  | 2.18 |
| Ni          | 40                       | 0.19           | 7.3    | 1.2  | 0.21           | 7.21   | 1.13 |
| Pb          | 35                       | 0.42           | 99.81  | 1.32 | 0.36           | 105.55 | 1.25 |
| As          | 15                       | 0.35           | 9.13   | 1.24 | 0.35           | 9.14   | 1.24 |
| Hg          | 0.15                     | 0.13           | 1.33   | 1.08 | 0.34           | 1.16   | 1.24 |
| Zn          | 100                      | 0.26           | 492.36 | 1.16 | 0.20           | 512.31 | 1.12 |
| Cd          | 0.2                      | -0.0001        | 0.16   | 1.00 | -0.059         | 0.16   | 0.97 |
